# Supplementary material for: Spherical nucleic acids as an infectious disease vaccine platform
Source: PubMed Central journal article supplement (PMC9168922; doi:10.1073/pnas.2119093119), 2022-03-21
Supplement: pnas.2119093119.sapp.pdf [file pnas.2119093119.sapp.pdf]

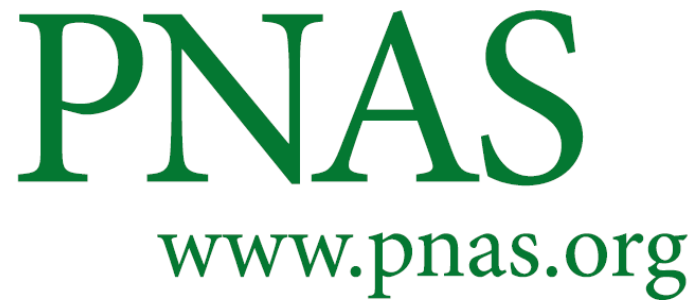

**Supplementary Information for**  
**Spherical Nucleic Acids as an Infectious Disease Vaccine Platform**

Michelle H. Teplensky<sup>a,b,1</sup>, Max E. Distler<sup>a,b,1</sup>, Caroline D. Kusmierz<sup>a,b</sup>, Michael Evangelopoulos<sup>c</sup>,  
Haley Gula<sup>d</sup>, Derek Elli<sup>d</sup>, Anastasia Tomatsidou<sup>d</sup>, Vlad Nicolaescu<sup>d</sup>, Ian Gelarden<sup>e</sup>, Anjana  
Yeldandi<sup>e</sup>, Daniel Battle<sup>f</sup>, Dominique Missiakas<sup>d</sup>, and Chad A. Mirkin<sup>a,b,c,2</sup>

Chad Mirkin  
Email: [chadnano@northwestern.edu](mailto:chadnano@northwestern.edu)

**This PDF file includes:**

Figures S1 to S7  
Tables S1 to S3

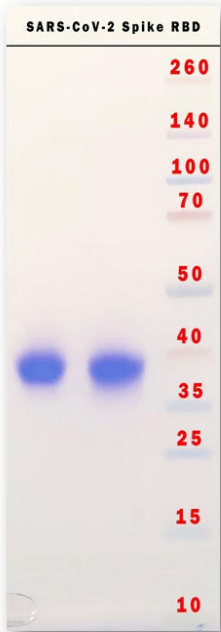

**Fig. S1.** SDS PAGE of SARS-CoV-2 Spike protein RBD. Protein was expressed in Expi293 and purified by Ni-affinity chromatography. Two different batches of sample are shown for demonstration of reproducible expression and purification. The molecular weight of the protein is 40,315.17 Da.

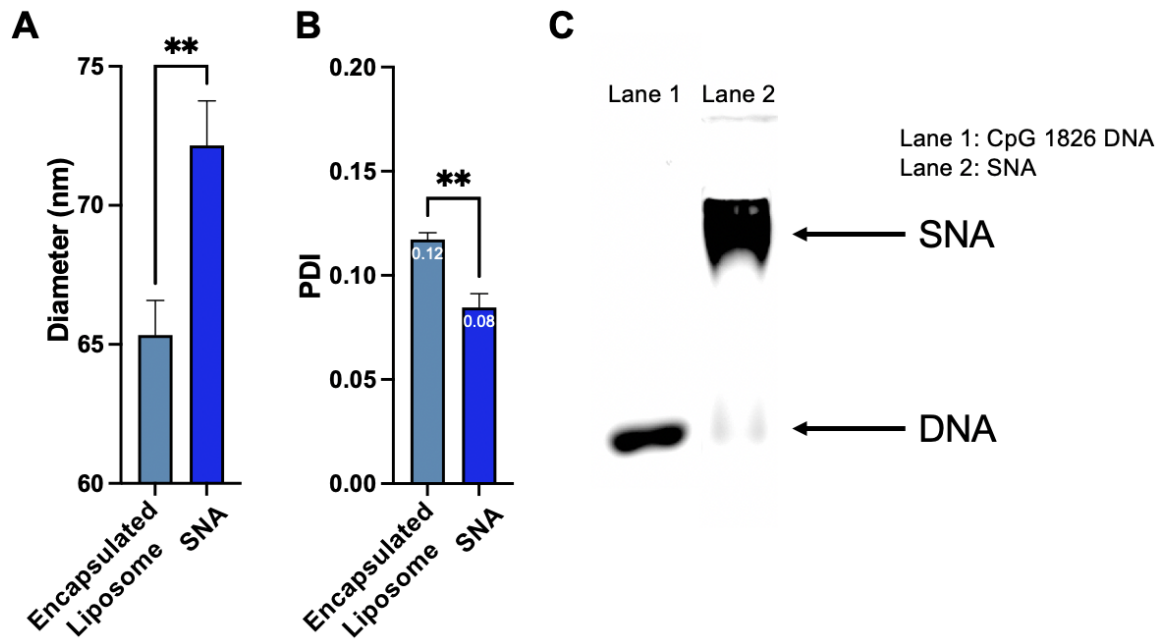

**Fig. S2.** SNA formation confirmed through dynamic light scattering (DLS) and agarose gel electrophoresis. (A) DLS demonstrates a significant increase in diameter and (B) a decrease in polydispersity index (PDI) as a result of addition of the DNA shell. (C) Agarose gel electrophoresis highlights the mobility shift of DNA as a result of SNA formation.

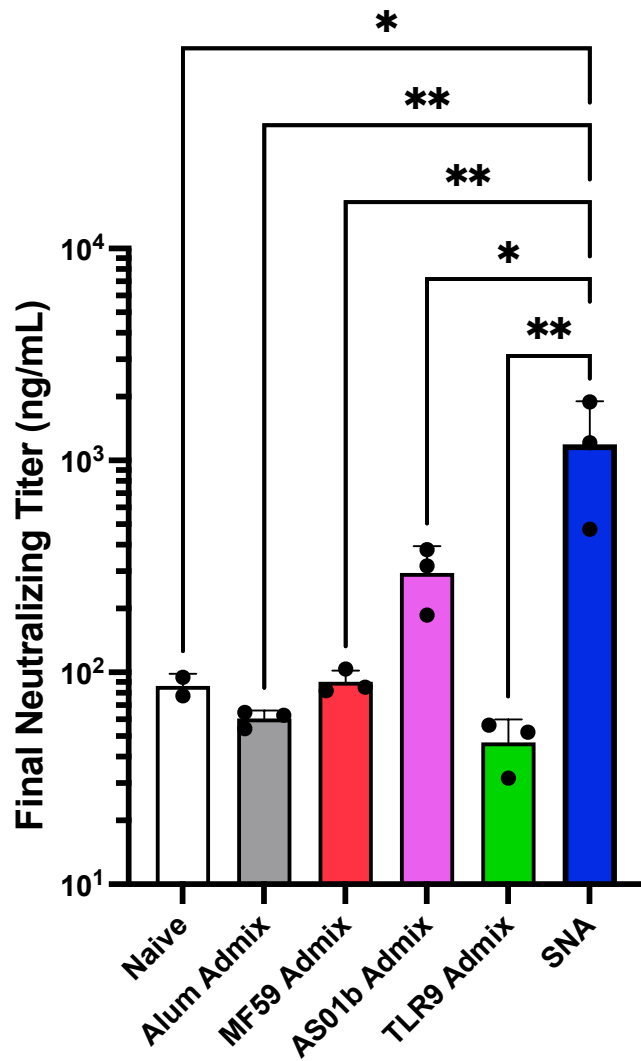

**Fig. S3.** Final neutralizing titer calculated in a pseudovirus inhibition study and fit to a standard curve using sera collected from C57BL/6 mice 21 days post a single prime injection. \* $p < 0.05$ ; \*\* $p < 0.01$ .

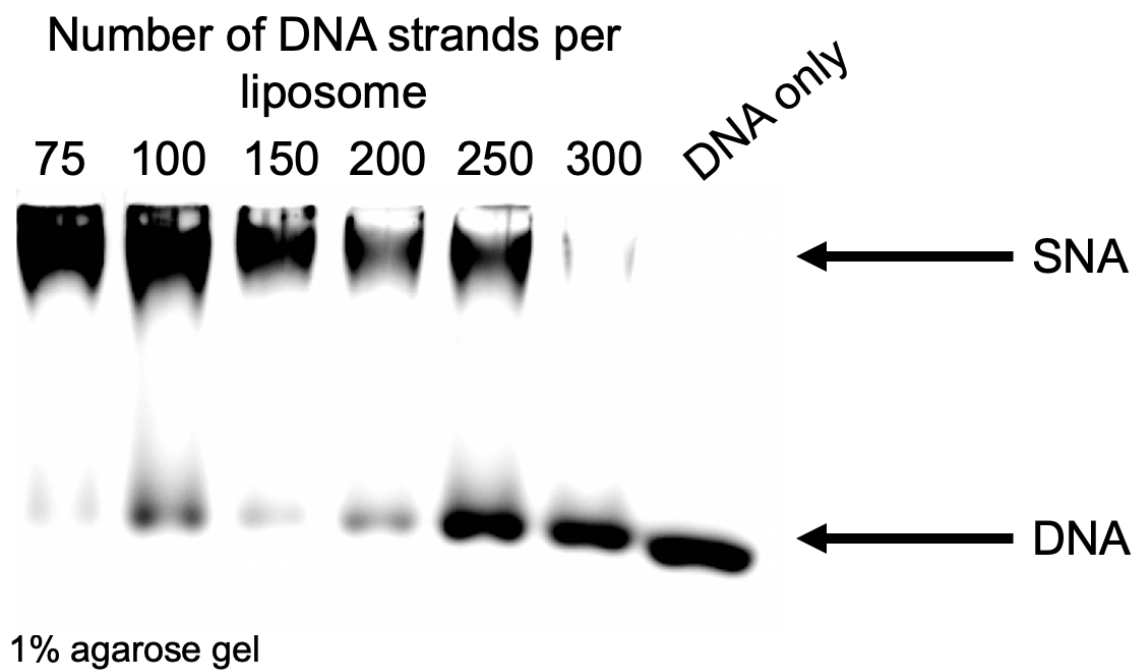

**Fig. S4.** Determination of maximum loading of DNA per liposome before dissociation. The last detectable SNA band that also has a low intensity DNA band, indicating low levels of dissociation, is present at a stoichiometry of 200 DNA strands per liposome.

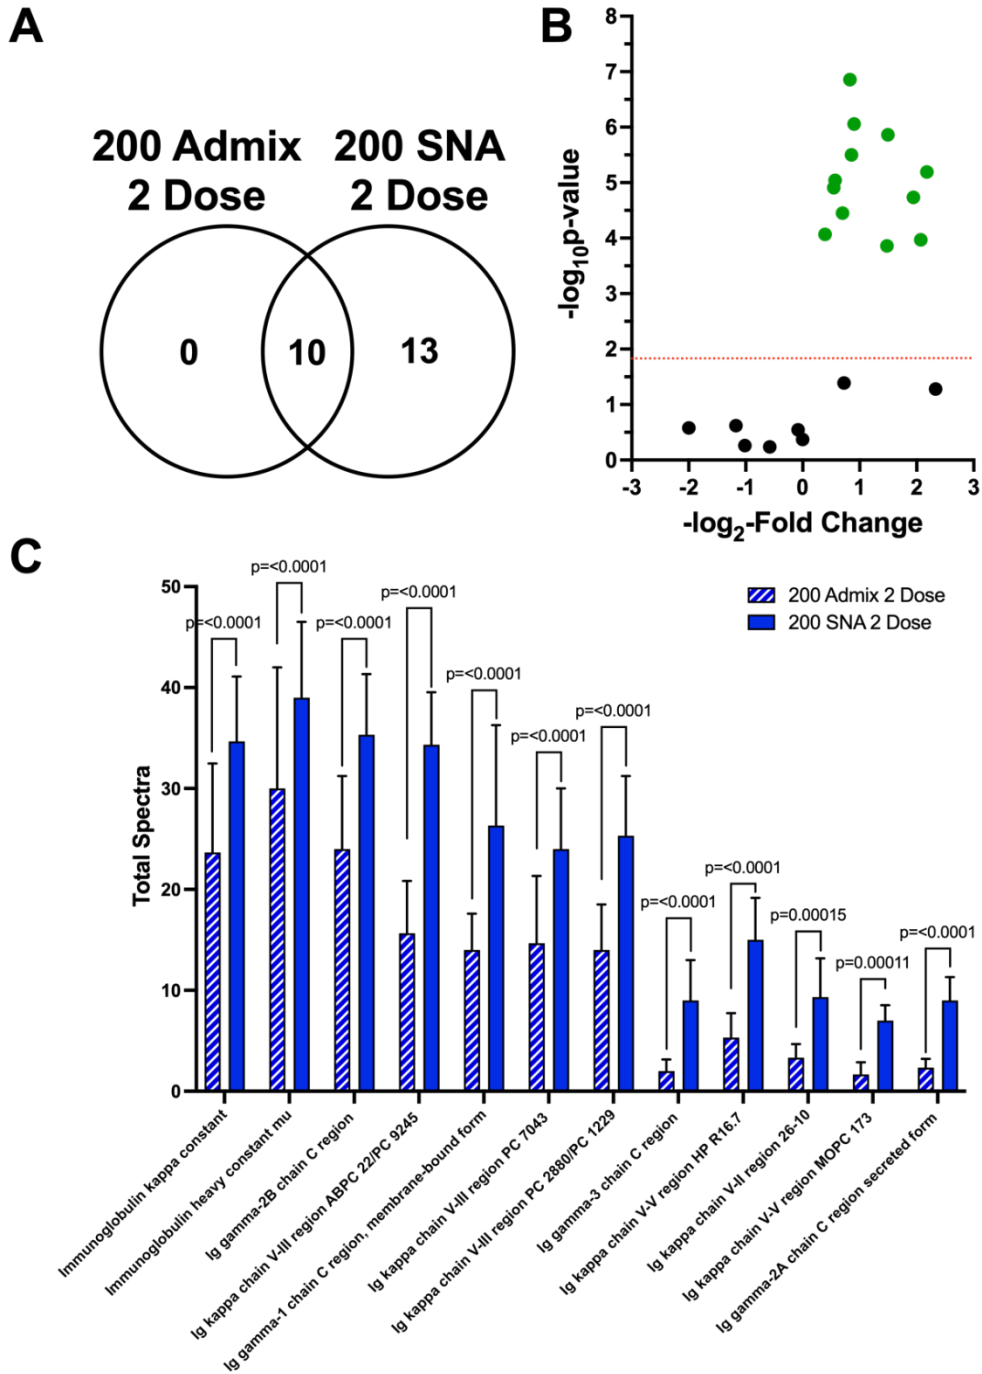

**Fig. S5.** (A) Quantitative profile of immunoglobulins between the 200 Admix 2 dose group and 200 SNA 2 dose group. (B) Volcano plot showing relative fold change and significance of different Igs when comparing the 200 Admix 2 dose against the 200 SNA 2 dose group. Red line indicates significance threshold. (C) The identified significant upregulated proteins were plotted as a function of total spectra with significance shown. Significance threshold =  $p < 0.01585$ .

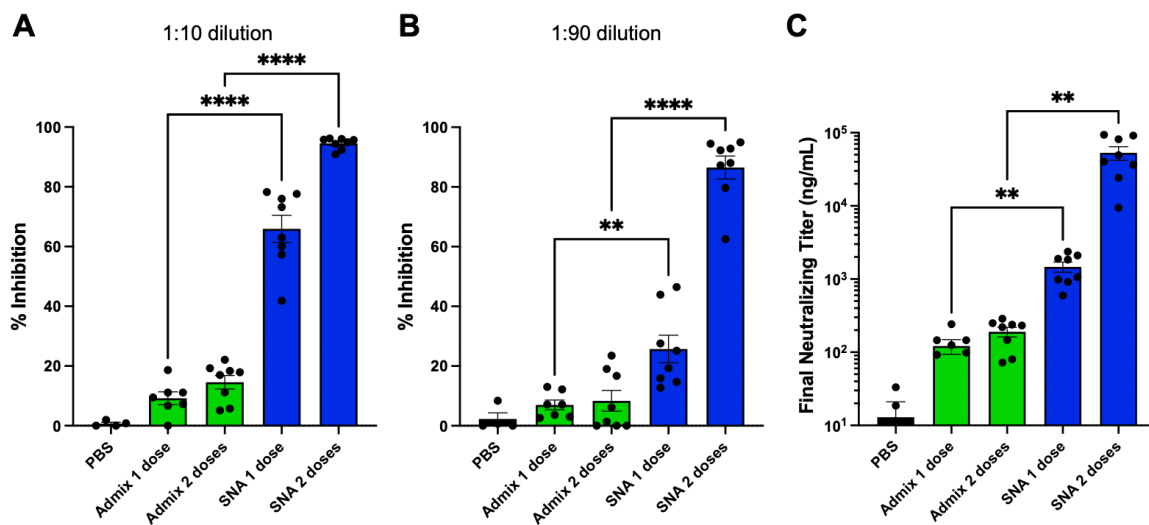

**Fig. S6.** Sera from k18-hACE2 transgenic mice were collected after immunization with different vaccines just prior to infection with virus to verify neutralizing antibody production. (A,B) Different dilutions of sera were assessed for antibody ability to inhibit RBD binding to ACE2 in a pseudovirus assay. SNA at either dose is significantly more effective at inhibition than admix. (C) Values from assay were fit to a standard curve to calculate a final neutralizing titer. \*\* $p < 0.01$ ; \*\*\*\* $p < 0.0001$ .

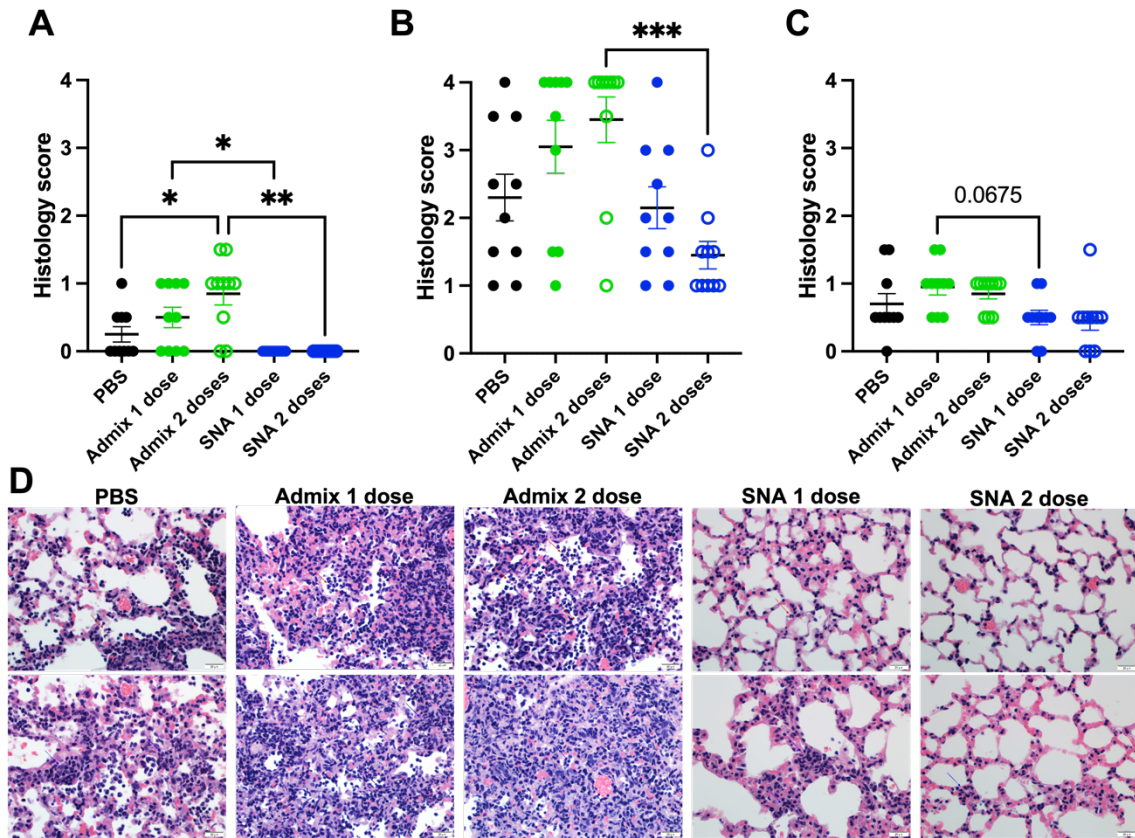

**Fig. S7.** Lung histopathology analysis from k18-hACE2 transgenic mice immunized with vaccines and challenged with a lethal infection of SARS-CoV-2. Lungs were collected on date of death (day 5 for PBS and admix vaccine either dose, and day 12 for SNA vaccine either dose). Scoring of (A) necrosis, (B) mononuclear infiltrates, and (C) edema. (D) Representative images of lungs stained with hematoxylin and eosin. Two representative images shown per group (magnification: 400x). Scale bar = 20  $\mu$ m for all images. PBS group shows expansion of alveolar septae by inflammatory cells with solitary neutrophils in airspaces (red arrow, top image) and multiple foci of alveolar septal expansion by aggregates of mononuclear cells (blue arrows, bottom image). Admix 1 dose group shows dense inflammatory infiltrate including aggregates of neutrophils within airspaces (red arrow, top image) and diffuse expansion of alveolar septae by variably dense aggregates of mononuclear cells (blue arrows, bottom image). Admix 2 dose group shows dense inflammatory infiltrate including aggregates of neutrophils within airspaces (red arrow, top image) and diffuse mononuclear infiltrate consisting of variably sized lymphocytes with dense to open nuclear chromatin (blue arrows, bottom image) causing marked architectural distortion and expansion of alveolar septae. SNA 1 dose group shows rare, scattered neutrophils (red arrow, top image) sequestered in thin alveolar septae and foci of alveolar septal expansion by loose aggregates of mononuclear cells (blue arrows, bottom image). SNA 2 dose group shows thin alveolar septae with rare to absent neutrophils (top image) and focal expansion of alveolar septae by small loose aggregate of mononuclear cells (blue arrow, bottom image). \* $p < 0.05$ ; \*\* $p < 0.01$ ; \*\*\* $p < 0.001$ .



**Table S1.** DNA Adjuvant Sequences used in this work.

| Name                                 | Sequence (5' to 3') <sup>3</sup>                                          | Backbone<br>(PS =<br>phosphorothioate) | Calc'd<br>Mass<br>g/mol | Extinction<br>Coefficient<br>L/(mole·cm) <sup>1</sup> |
|--------------------------------------|---------------------------------------------------------------------------|----------------------------------------|-------------------------|-------------------------------------------------------|
| CpG 1826                             | TCC ATG ACG TTC CTG ACG<br>TT (Spacer18) <sub>2</sub> Cholesterol         | PS                                     | 6364.1                  | 181100                                                |
| CpG 1826<br>Cy5                      | TCC ATG ACG TTC CTG ACG<br>TT Cy5 (Spacer18) <sub>2</sub> Cholesterol     | PS                                     | 8405.6                  | 191100                                                |
| Fluorophore<br>-labeled <sup>2</sup> |                                                                           |                                        |                         |                                                       |
| CpG 7909                             | TCG TCG TTT TGT CGT TTT<br>GTC GTT (Spacer18) <sub>2</sub><br>Cholesterol | PS                                     | 7698.2                  | 209400                                                |

<sup>1</sup> Calculated using IDT's OligoAnalyzer Tool: <https://www.idtdna.com/calc/analyzer>

<sup>2</sup> Cy5 = 1-[3-(4-monomethoxytrityloxy)propyl]-1'-[3-[(2-cyanoethyl)-(N,N-diisopropylphosphoramidyl)propyl]-3,3,3',3'-tetramethylindodicarbocyanine chloride; Stock no. 10-5915 (Glen Research)

<sup>3</sup> Spacer18 = 18-O-Dimethoxytritylhexaethyleneglycol,1-[(2-cyanoethyl)-(N,N-diisopropyl)]-phosphoramidite; Stock no. 10-1918 (Glen Research)

**Table S2.** List of Immunoglobulin (Ig) proteins detected by proteomics. Yellow shading indicates those that were significant in a Fisher's Exact T test between the 200 SNA and 150 SNA group.

| Name                                                    | Molecular Weight | Fisher's Exact Test (p-value): *(p < 0.0063) <sup>2</sup> | Total Spectra Count (Integer avg for group) |         |         |
|---------------------------------------------------------|------------------|-----------------------------------------------------------|---------------------------------------------|---------|---------|
|                                                         |                  |                                                           | 75 SNA                                      | 150 SNA | 200 SNA |
| Immunoglobulin kappa constant                           | 12 kDa           | 0.37                                                      | 4                                           | 37      | 26      |
| Immunoglobulin heavy constant mu                        | 50 kDa           | < 0.00010                                                 | 13                                          | 20      | 32      |
| Ig gamma-2B chain C region                              | 44 kDa           | < 0.00010                                                 | 6                                           | 12      | 19      |
| Ig kappa chain V-III region ABPC 22/PC 9245             | 12 kDa           | 0.00016                                                   | 7                                           | 12      | 17      |
| Ig gamma-1 chain C region, membrane-bound form          | 43 kDa           | 0.059                                                     | 4                                           | 14      | 14      |
| Ig kappa chain V-III region PC 7043                     | 12 kDa           | 0.00032                                                   | 6                                           | 10      | 15      |
| Ig kappa chain V-III region PC 2880/PC 1229             | 12 kDa           | 0.0011                                                    | 0                                           | 11      | 15      |
| Ig gamma-3 chain C region                               | 44 kDa           | 0.17                                                      | 2                                           | 7       | 6       |
| Ig kappa chain V-V region HP R16.7                      | 12 kDa           | 0.25                                                      | 3                                           | 4       | 4       |
| H-2 class I histocompatibility antigen, Q10 alpha chain | 37 kDa           | 0.53                                                      | 3                                           | 8       | 5       |
| Ig kappa chain V-II region 26-10                        | 12 kDa           | 0.079                                                     | 1                                           | 4       | 5       |
| Ig kappa chain V-V region MOPC 173                      | 12 kDa           | 0.45                                                      | 1                                           | 2       | 1       |
| Ig heavy chain V region AC38 205.12                     | 13 kDa           | 0.4                                                       | 0                                           | 3       | 3       |
| Ig gamma-2A chain C region secreted form                | 37 kDa           | 0.32                                                      | 2                                           | 2       | 2       |
| Ig heavy chain V region 93G7                            | 16 kDa           | 0.56                                                      | 0                                           | 1       | 1       |
| Ig heavy chain V-III region HPC76 (Fragment)            | 12 kDa           | 0.086                                                     | 0                                           | 0       | 1       |
| Ig kappa chain V-V region MOPC 41                       | 14 kDa           | 0.18                                                      | 0                                           | 1       | 1       |
| Ig heavy chain V region HPCG14                          | 14 kDa           | 0.29                                                      | 0                                           | 1       | 1       |
| Polymeric immunoglobulin receptor                       | 85 kDa           | 0.47                                                      | 0                                           | 0       | 0       |
| Ig alpha chain C region                                 | 37 kDa           | 1                                                         | 0                                           | 0       | 0       |

**Table S3.** Clinical Scoring Table for *In Vivo* Lethal Viral Challenge Study

| Clinical Score | Description                                                                                                                                                                                                    |
|----------------|----------------------------------------------------------------------------------------------------------------------------------------------------------------------------------------------------------------|
| 0              | (Pre-Inoculation) - Mice Are Bright, Alert, Active, Normal Fur Coat and Posture.                                                                                                                               |
| 1              | (Post-Inoculation) - Mice Are Bright, Alert, Active, Normal Fur Coat and Posture, No Weight Loss.                                                                                                              |
| 1.5            | (Post-Inoculation) - Mice Present with Slightly Ruffled Fur but Are Active <b>OR</b> Weight Loss Might Occur But Does Not Reach 2.5%; Recovery Can Be Expected.                                                |
| 2              | (Post-Inoculation) - Ruffled Fur <b>OR</b> Less Active <b>OR</b> < 5% Weight Loss; Recovery Might Occur.                                                                                                       |
| 2.5            | (Post-Inoculation) - Ruffled Fur <b>OR</b> Not Active but Moves When Touched <b>OR</b> Hunched Posture <b>OR</b> Difficulty Breathing <b>OR</b> Weight Loss 5-10%; Recovery Is Unlikely But Still Might Occur  |
| 3              | (Post-Inoculation) - Ruffled Fur <b>OR</b> Inactive but Moves When Touched <b>OR</b> Difficulty Breathing <b>OR</b> Weight Loss At 11- 20%; Recovery Is Not Expected                                           |
| 4              | (Post-Inoculation) - Ruffled Fur <b>OR</b> Positioned on Its Side or Back <b>OR</b> Dehydrated <b>OR</b> Difficulty Breathing <b>OR</b> Weight Loss >20% <b>OR</b> Labored Breathing; Recovery Is Not Expected |
| 5              | (Post-Inoculation) - Death                                                                                                                                                                                     |
